# Supplementary material for: Organosilver(i/ii) catalyzed C–N coupling reactions – phenazines
Source: Royal Society of Chemistry journal article supplement (doi:10.1039/c3cy20798f), 2013-01-01
Supplement: c3cy20798f.pdf [file c3cy20798f.pdf]

## SUPPORTING INFORMATION

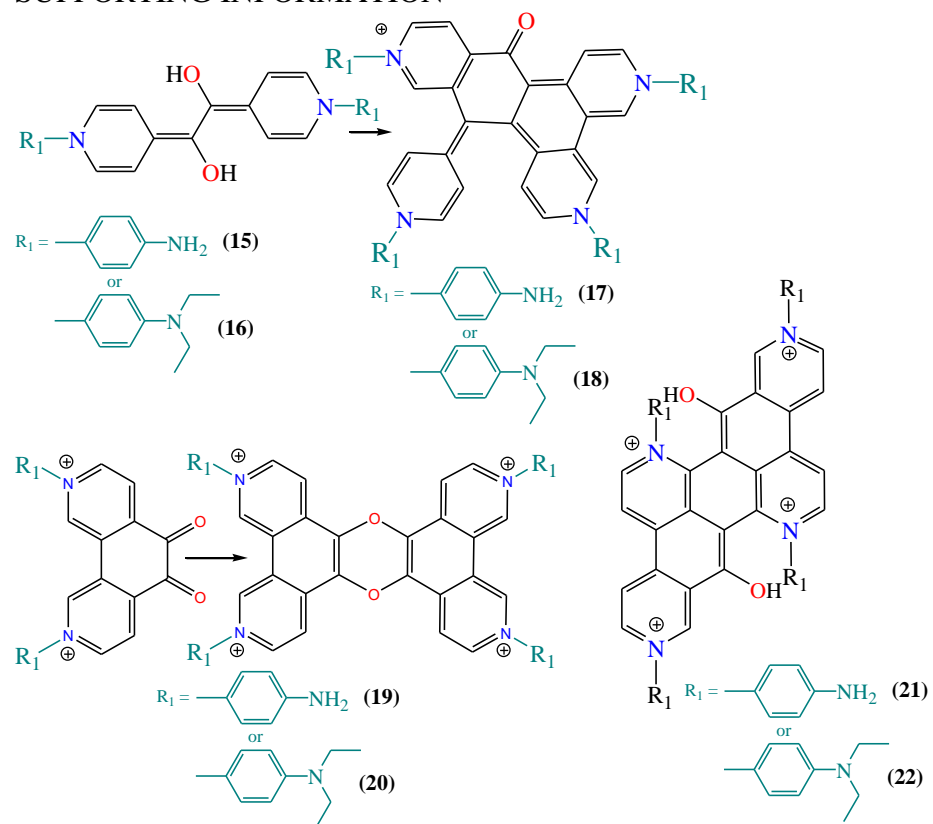

**Scheme S1.** Chemical diagrams of studied phenazines **15–22**, respectively.

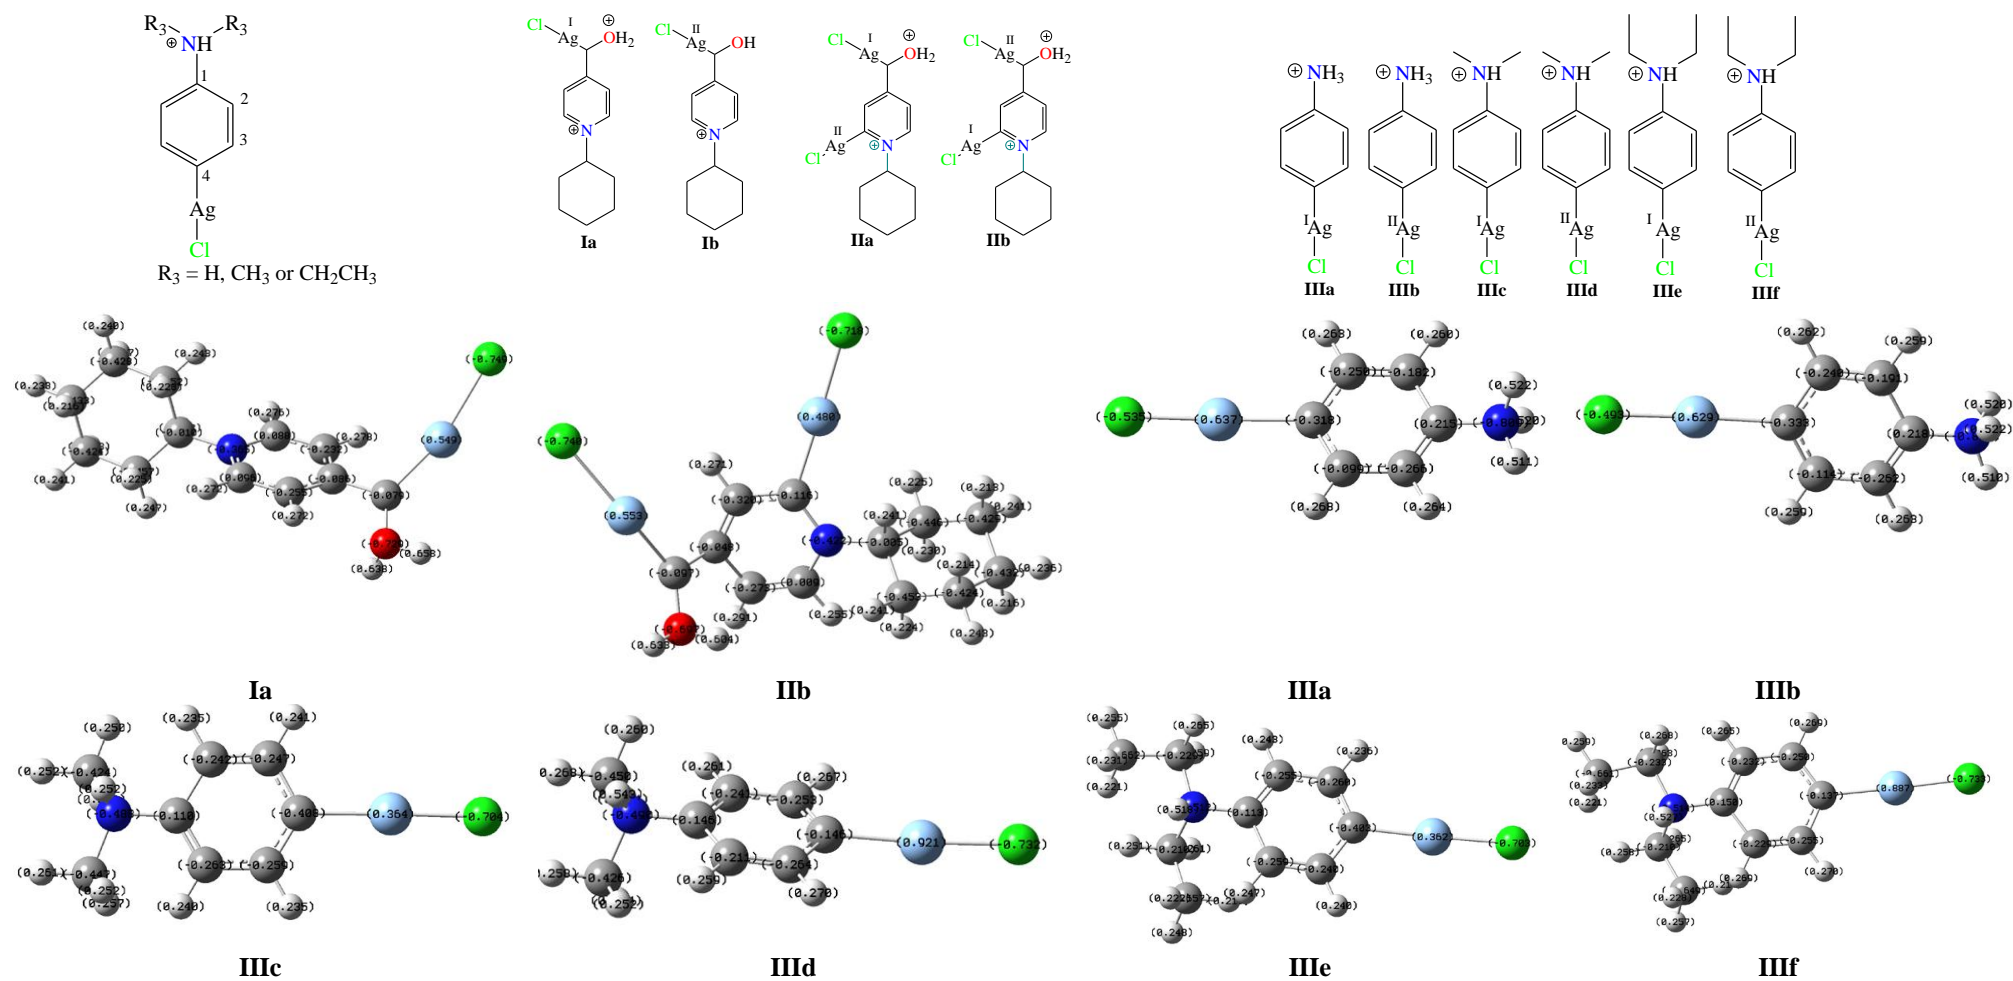

**Scheme S2.** Chemical diagram of the organometallics of type **I–III**, from the corresponding starting aniline reagents; Most stable molecular geometry and the theoretical  $q_X(\text{NBO})$  data, here  $X = \text{Ag}, \text{Cl}, \text{C}, \text{O}$  and  $\text{N}$ , respectively.

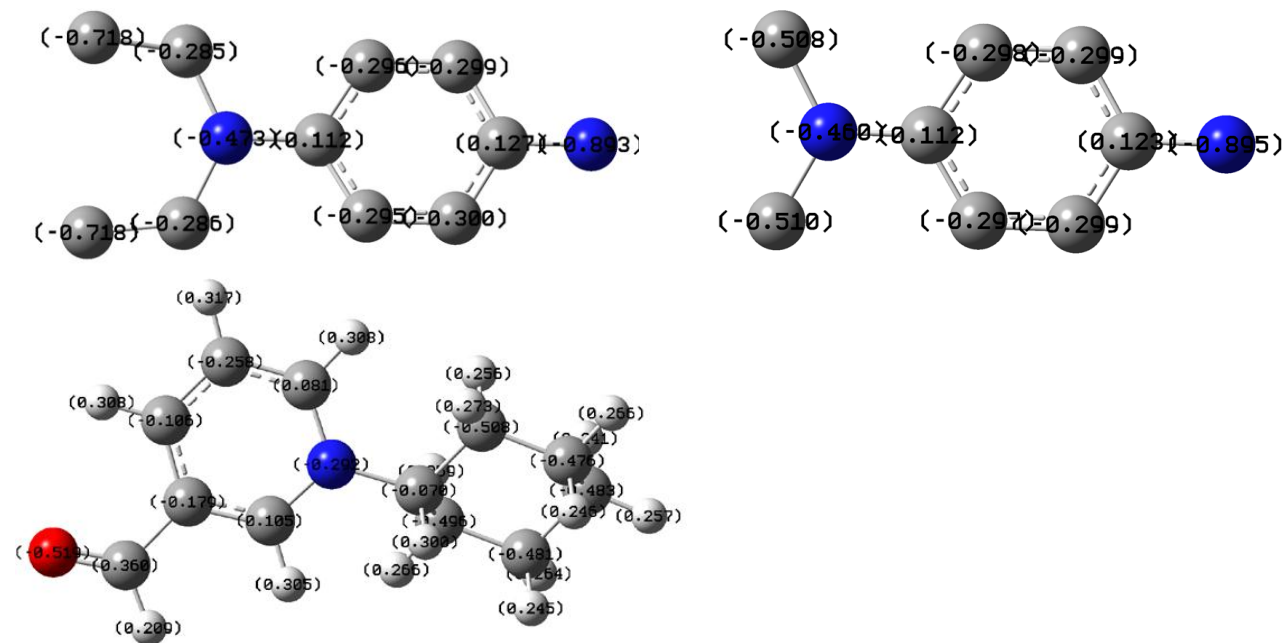

**Scheme S3.** Most stable conformation of the N,N-diethyl-p-phenylenediamine, N,N-dimethyl-p-phenylenediamine, and N-cyclohexyl-3-pyridyl carbaldehyde; Theoretical  $q_X(\text{NBO})$  values, where the X = C, N and O; The H-atoms are omitted.

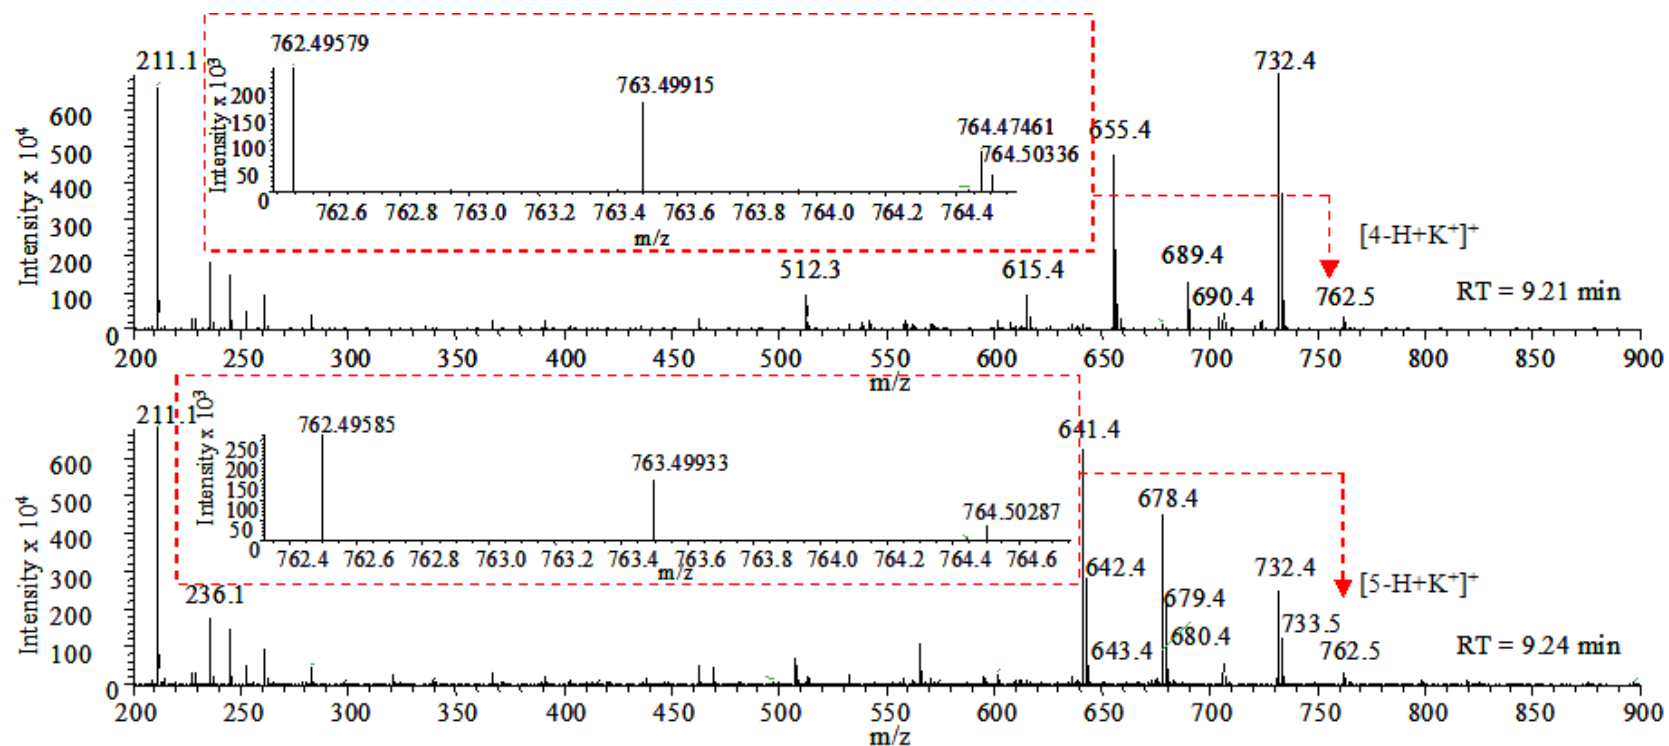

Figure S1. ESI-MS spectra of 4 and 5, respectively.
